# Supplementary material
Source: PubMed Central journal article supplement (PMC5577498)
Supplement: rspb20171486supp1.pdf [file rspb20171486supp1.pdf]

## SUPPLEMENTARY MATERIAL

### Socially cued seminal fluid gene expression mediates adaptive responses in ejaculate quality to sperm competition risk

---

Leigh W. Simmons and Maxine Lovegrove

Centre for Evolutionary Biology, School of Biological Sciences (M092), The University of Western Australia, Crawley 6009, Australia.

---

**Table S1.** Primer and reporter sequences for the gene expression assays

| Gene            | Transcript  | Forward primer             | Reverse primer              | Reporter sequence |
|-----------------|-------------|----------------------------|-----------------------------|-------------------|
| <i>Actin</i>    | Isotig01761 | TGCCATTCTCCGATTGGATCTG     | ACGCTCGGTAAGGATCTTCATG      | CTGGCCGTGACTTGAC  |
| <i>ToSfp001</i> | Isotig01262 | GTAGTGATAGTGCAATCTGGTTACGA | CACAATTTCCCGCCTTCATC        | TTTGACCGCCGT      |
| <i>ToSfp005</i> | Isotig01832 | GCGTGTTGCGCCTCTTC          | CGTCCTCAGGACTGGAGTCA        | CACGCTCACGCACTCC  |
| <i>ToSfp007</i> | Isotig00263 | GCAGAGTACCCATATCAGGTTTCAC  | AGTCAGCACTTGTGACAAAAAATTT   | TCGGCGTACATAAATG  |
| <i>ToSfp011</i> | Isotig01709 | GCCGAGCAACTGCTGAC          | CCGCCTCCTCTTCCTCCTT         | TCTCCGCCGCCTCGTC  |
| <i>ToSfp017</i> | Isotig05129 | TCGTGGGTGCGGAGTG           | CGGCCTTGGCCACGAA            | CAGGGCGTGGACCGG   |
| <i>ToSfp022</i> | Isotig00444 | GCCGAGCCGGAGGTA            | GCTTCTCCACGGCCTTGA          | TCCCGCCCCTGCCGC   |
| <i>ToSfp023</i> | Isotig00811 | CCAGCAGCTGGTGGAGAAC        | GGATGATGTGCCAGTCAACGT       | CAACGCCGACCTCATC  |
| <i>ToSfp024</i> | Isotig02293 | AGAGCATCATGCCAGAATTCCA     | GTGGTGAGGGAGCCATTGTAC       | CCCGTGCGACTACTTC  |
| <i>ToSfp026</i> | Isotig06304 | GCGAGTTACTTTTTCTTGACAGAATC | CCACTTCTTGCTGAAAAGATGAACAA  | TCTCGCAGACATTCTT  |
| <i>ToSfp027</i> | Isotig00169 | GGGCGCTACTTGATCATG         | ACGAAATGCCGCCAGTAA          | ACCCCTCCCACGCTCT  |
| <i>ToSp009</i>  | Isotig00560 | TGCTGGCAATAAACTAGCTATGCAA  | CTTCACATCCCATTTTCATAGCTTCAG | CAGGAGCTGCATCTTT  |

**Table S2.** Primer sequences for dsRNA\*

| Gene            | Transcript  | Forward primer       | Reverse primer          | Product length |
|-----------------|-------------|----------------------|-------------------------|----------------|
| <i>ToSfp001</i> | Isotig01262 | TACGAGCCGTTGGAGGACTA | TTTGGAGTGCTTCGTGCGAT    | 444            |
| <i>ToSfp005</i> | Isotig01832 | ACAAGGACGCTGTGGAGATG | ACGAGTGCGAGAAGATGACG    | 435            |
| <i>ToSfp011</i> | Isotig01709 | AGCCCTCAGACAACAAGCTG | GAAACTCACAGGAGGTCCCG    | 579            |
| <i>ToSfp017</i> | Isotig05129 | CTCAGATACCTCGGCGTCAC | GGCGAAGATCCAGTGGAGAG    | 372            |
| <i>ToSfp022</i> | Isotig0444  | AAGCGAAGAAGGACGAGGTG | CGCTTAAGAGCTGGGCTTCT    | 524            |
| <i>ToSfp023</i> | Isotig0811  | TACCTGAAAGAGCTGGCAGC | TGCTGCAGTCTCAGGTTTCAG   | 465            |
| <i>ToSfp027</i> | Isotig0169  | TCGGGGGTGGTTTTTGTCAA | ACGTGAACGAAGATGTTAAACGA | 398            |

\*T7 promotor sequence 5'-TAATACGACTCACTATAGGGAGA-3'

**Table S3.** Principal components analysis on the covariance matrix of expression values for seven seminal fluid protein genes that were up-regulated in response to male calls

|                        | PC1    | PC2    |
|------------------------|--------|--------|
| Eigenvalue             | 1.639  | 0.235  |
| Variance explained (%) | 76.96  | 11.02  |
| <i>ToSfp001</i>        | 0.006  | 0.037  |
| <i>ToSfp005</i>        | -0.030 | 0.970  |
| <i>ToSfp011</i>        | 0.111  | -0.004 |
| <i>ToSfp017</i>        | 0.987  | 0.009  |
| <i>ToSfp022</i>        | 0.035  | -0.060 |
| <i>ToSfp023</i>        | 0.033  | -0.008 |
| <i>ToSfp027</i>        | 0.097  | 0.231  |
